# Supplementary material for: Approaches to supporting lactation and breastfeeding for very preterm infants in the NICU: a qualitative study in three European regions
Source: HighWire-hosted journal article supplement (doi:10.1136/bmjopen-2014-006973), 2015-06-01
Supplement: bmjopen-2014-006973supp_2.pdf [file bmjopen-2014-006973supp_2.pdf]

**Table S2. Themes, sub-themes and framework categories**

| <b>Themes and sub-themes</b>                             | <b>Framework categories describing barriers and facilitators</b>               |
|----------------------------------------------------------|--------------------------------------------------------------------------------|
| <b>Lactation initiation:</b>                             |                                                                                |
| 1. Timing of discussion with mothers                     | Patients' role in decision-making                                              |
| 2. Informing mothers about lactation and breastfeeding   | Patients' role in decision making<br>Interpretation of evidence; Self-efficacy |
| <b>Human milk management :</b>                           |                                                                                |
| 1. Evaluation of risk-benefits of fresh human milk       | Interpretation of evidence                                                     |
| 2. Access to pasteurized milk                            | Resources                                                                      |
| <b>Lactation maintenance and transfer to the breast:</b> |                                                                                |
| 1. Maintaining milk supply                               | Self efficacy                                                                  |
| 2. Use of bottles                                        | Interpretation of evidence                                                     |
| 3. Breastfeeding as part of infant's care                | Self-efficacy                                                                  |
| 4. Transfer to the breast                                | Self efficacy<br>Patients' role in decision making                             |
| <b>Organizational factors:</b>                           |                                                                                |
| 1. Visiting policies                                     | Organizational constraints                                                     |
| 2. Privacy                                               | Resources                                                                      |
| 3. Discharge from neonatal unit                          | Organizational constraints                                                     |
