# Supplementary material for: Approaches to supporting lactation and breastfeeding for very preterm infants in the NICU: a qualitative study in three European regions
Source: HighWire-hosted journal article supplement (doi:10.1136/bmjopen-2014-006973), 2015-06-01
Supplement: bmjopen-2014-006973supp_3.pdf [file bmjopen-2014-006973supp_3.pdf]

**Table S3. Differences between at least two regions in practices and approaches to lactation and breastfeeding very preterm infants in the NICU**

| Themes                                           | Subthemes                                                  | Region                                                                                     |                                                                               |                                                                                                                       |
|--------------------------------------------------|------------------------------------------------------------|--------------------------------------------------------------------------------------------|-------------------------------------------------------------------------------|-----------------------------------------------------------------------------------------------------------------------|
|                                                  |                                                            | Ile-de-France                                                                              | Trent                                                                         | Lazio                                                                                                                 |
| Initiation of lactation                          | Timing of discussion with mothers                          | Concern with finding the right time to approach the mothers                                | Concern with finding the right time to approach mothers                       | Timing not mentioned, portrayed as positive                                                                           |
|                                                  | Informing mothers about lactation and breastfeeding        | Respect mother's decisions because breastfeeding is difficult                              | Encourage expression because of nutritive qualities of human milk.            | Have strong expectations that all mothers will breastfeed because of importance for mother-infant bonding             |
| Management of human milk                         | Evaluation of risk/benefits of fresh mother's own milk use | Concern about risks associated with infection transmission                                 | Less concern with risks                                                       | Less concern with risks                                                                                               |
|                                                  | Access to pasteurized milk                                 | Pasteurization of mother's own milk or donor milk allows more babies to receive human milk | Limited access to donor milk, not mentioned                                   | Donor milk is useful to initiate breast feeding when mother's milk is not available. Use of donor milk is complicated |
| Lactation maintenance and transfer to the breast | Maintaining milk supply                                    | Milk management practices affect maternal motivation                                       | Follow-up of mothers after expression initiation not well organized           | No mention of problems with lactation maintenance                                                                     |
|                                                  | Use of bottles                                             | Cups are better, but bottles have benefits                                                 | Cups are better, but bottles have benefits                                    | Bottles are not a problem                                                                                             |
|                                                  | Breastfeeding as part of the infant's care                 | Some nurses do not consider breastfeeding as part of their job.                            | Some nurses do not consider breastfeeding as part of their job                | Breastfeeding is part of the infant's care.                                                                           |
|                                                  | Transfer to the breast                                     | Process can be difficult, staff not always confident about the move to breast              | Process can be difficult, staff not always confident about the move to breast | Mothers demands to put babies at breast                                                                               |
| Organization                                     | Visiting policies                                          | Open visiting policies                                                                     | Open visiting policies                                                        | Restrictive visiting policies but mothers can enter for feeding or skin-to-skin                                       |
|                                                  | Privacy                                                    | Mothers need privacy                                                                       | Mothers need privacy                                                          | Privacy not mentioned                                                                                                 |
|                                                  | Discharge from neonatal unit                               | Bottle-fed babies go home sooner                                                           | Bottle-fed babies go home sooner                                              | Accept establishment of breastfeeding at home                                                                         |
